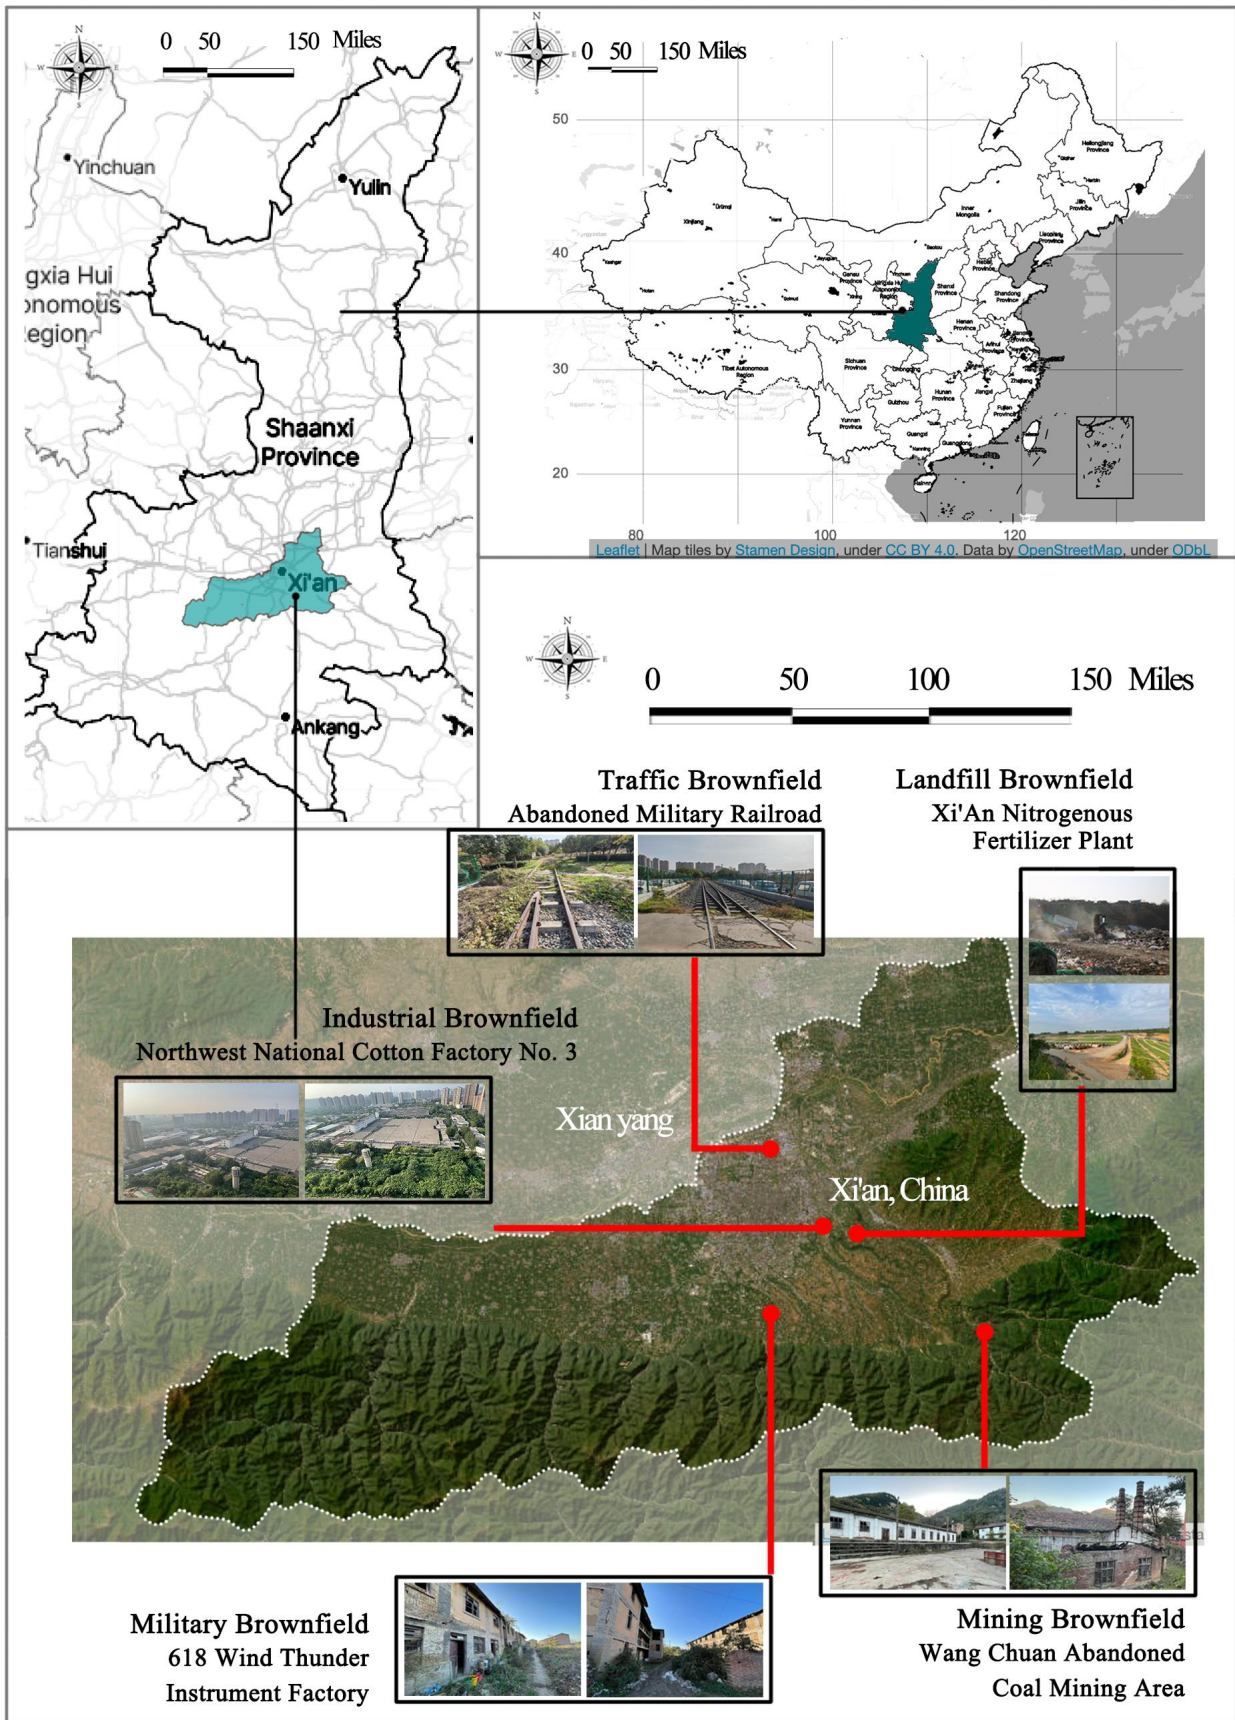

**Fig 1. Location of Xi'an, China, main distribution areas of brownfields, and siting of five types of brownfields.**

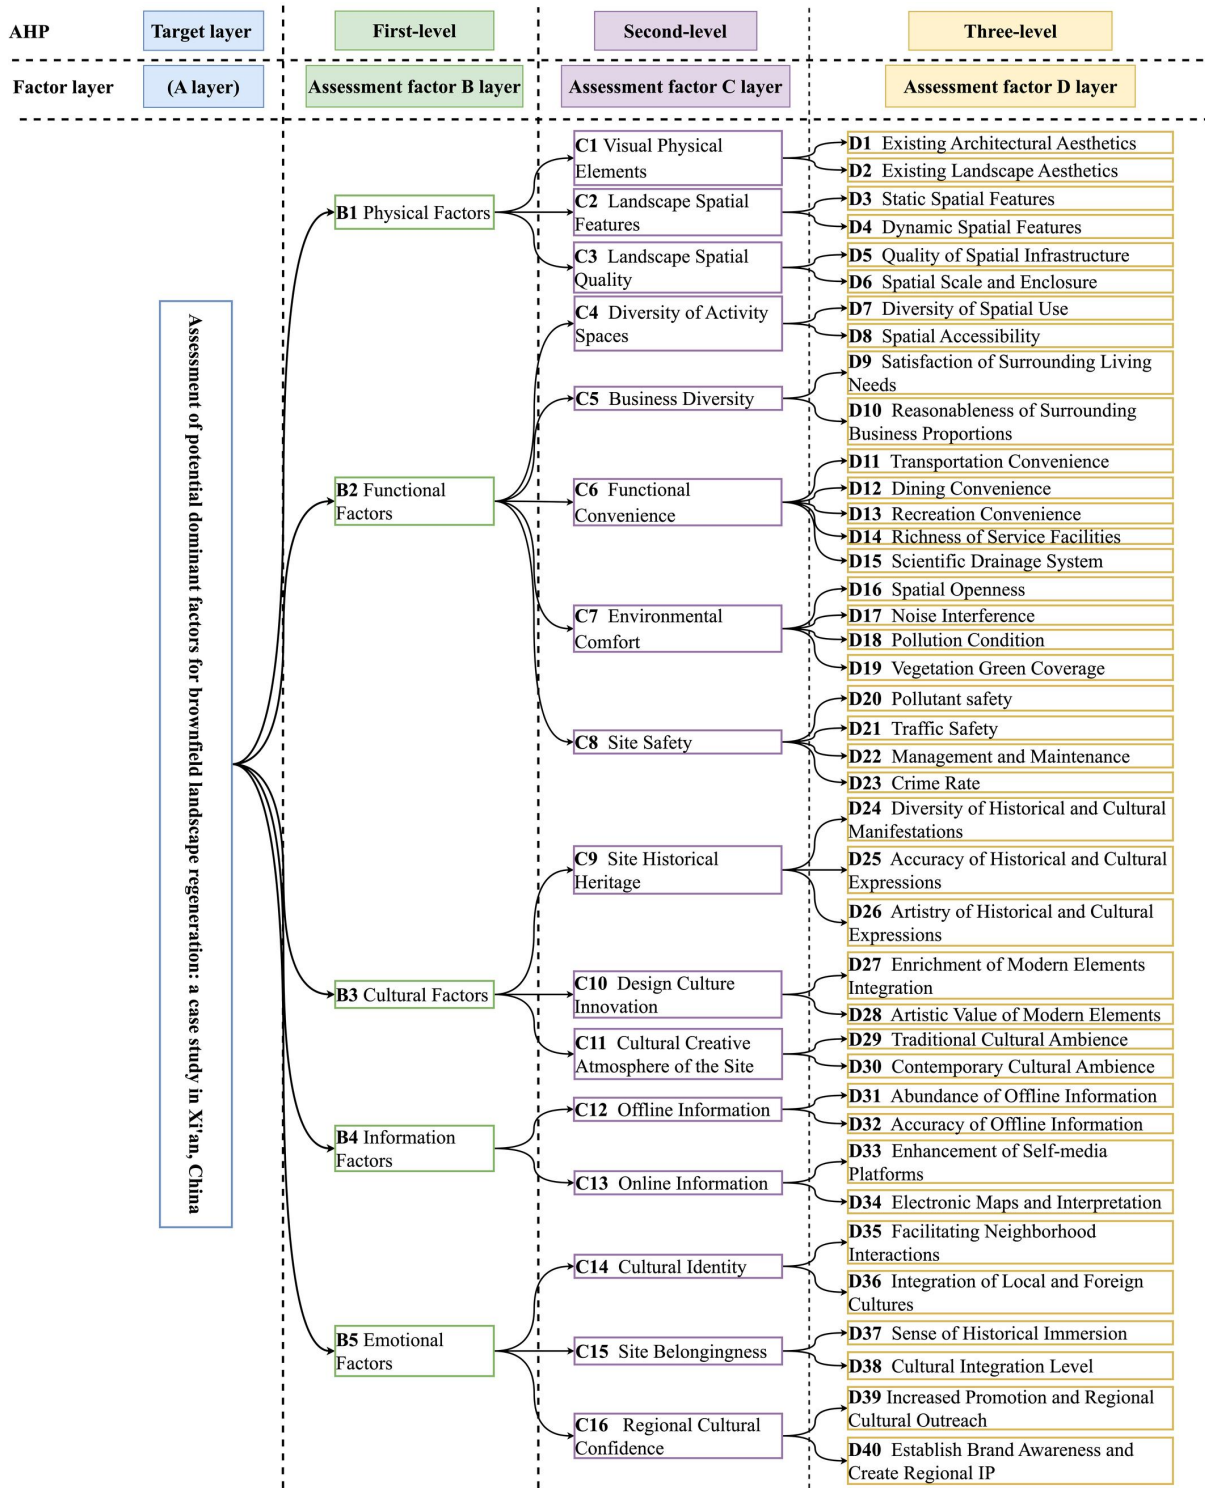

**Fig 2. Assessment indicator AHP model for brownfield landscape regeneration in Xi'an.**

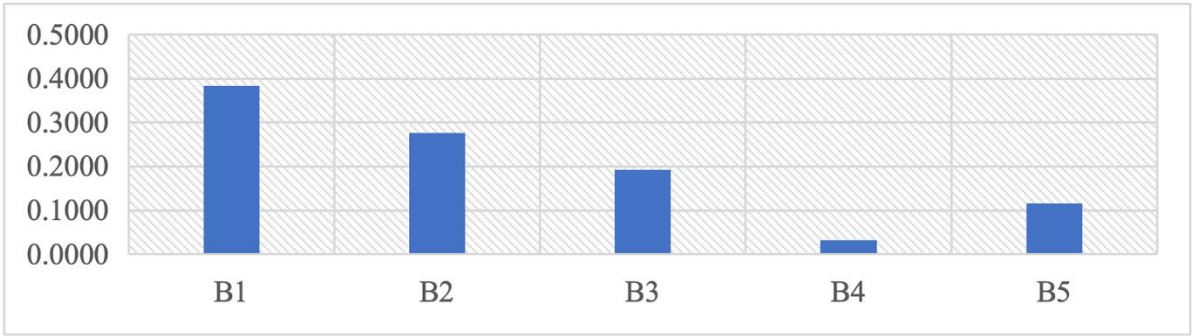

**Fig 3. Weights of the first-layer assessment factors in Layer B.**

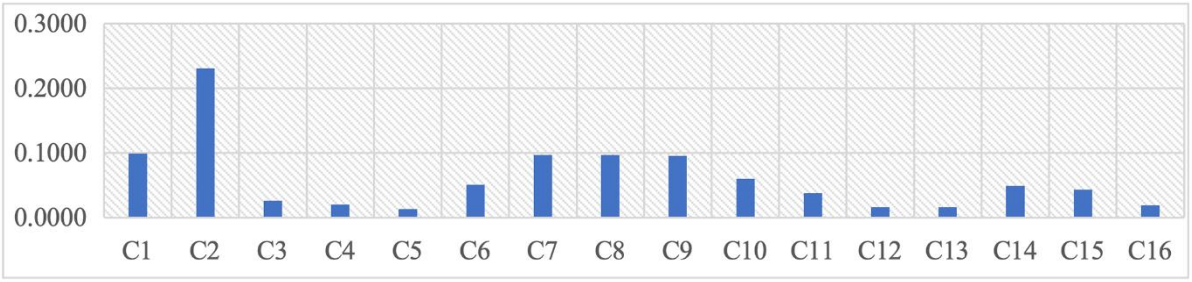

**Fig 4. Comprehensive weight of Layer C in second-layer assessment factors.**

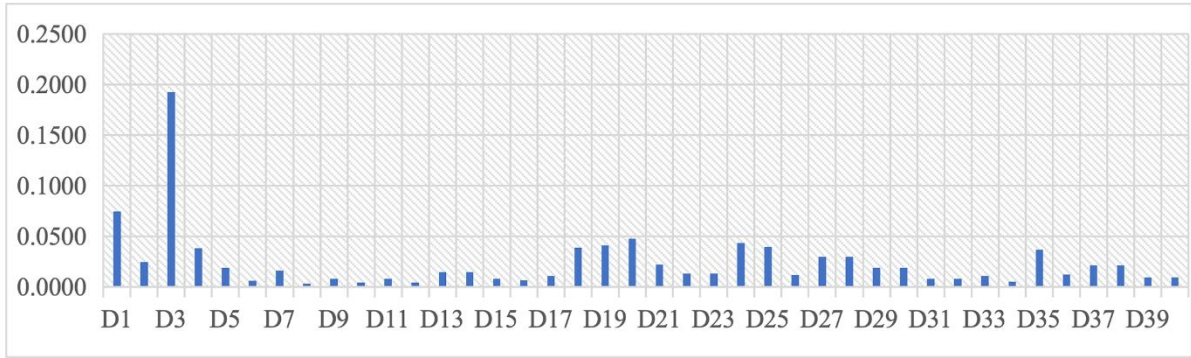

**Fig 5. Comprehensive weight of Layer D.**

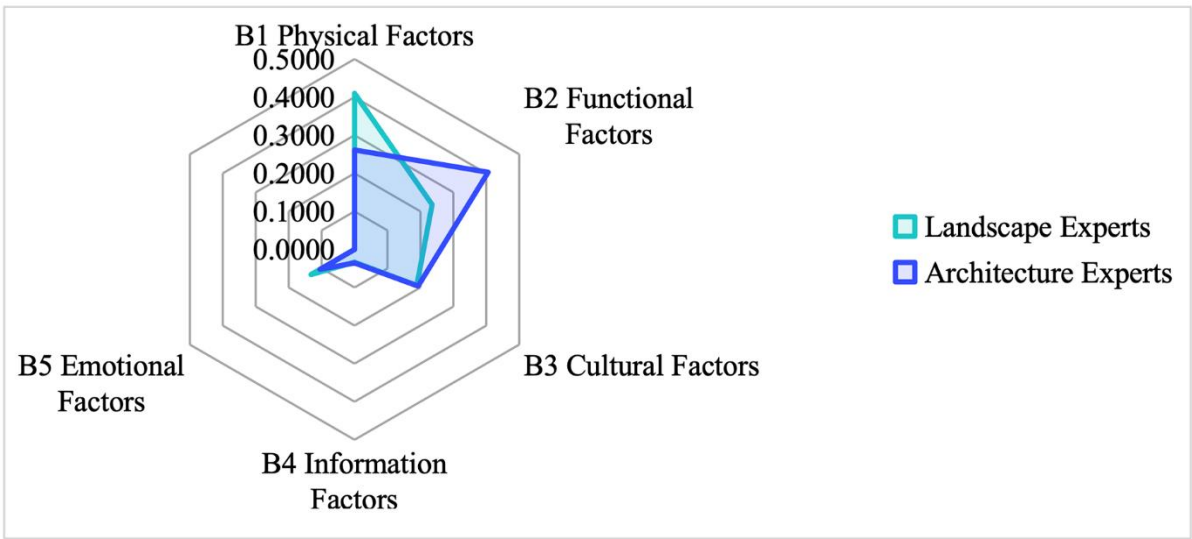

**Fig 6. Differences in importance assessment among different experts.**

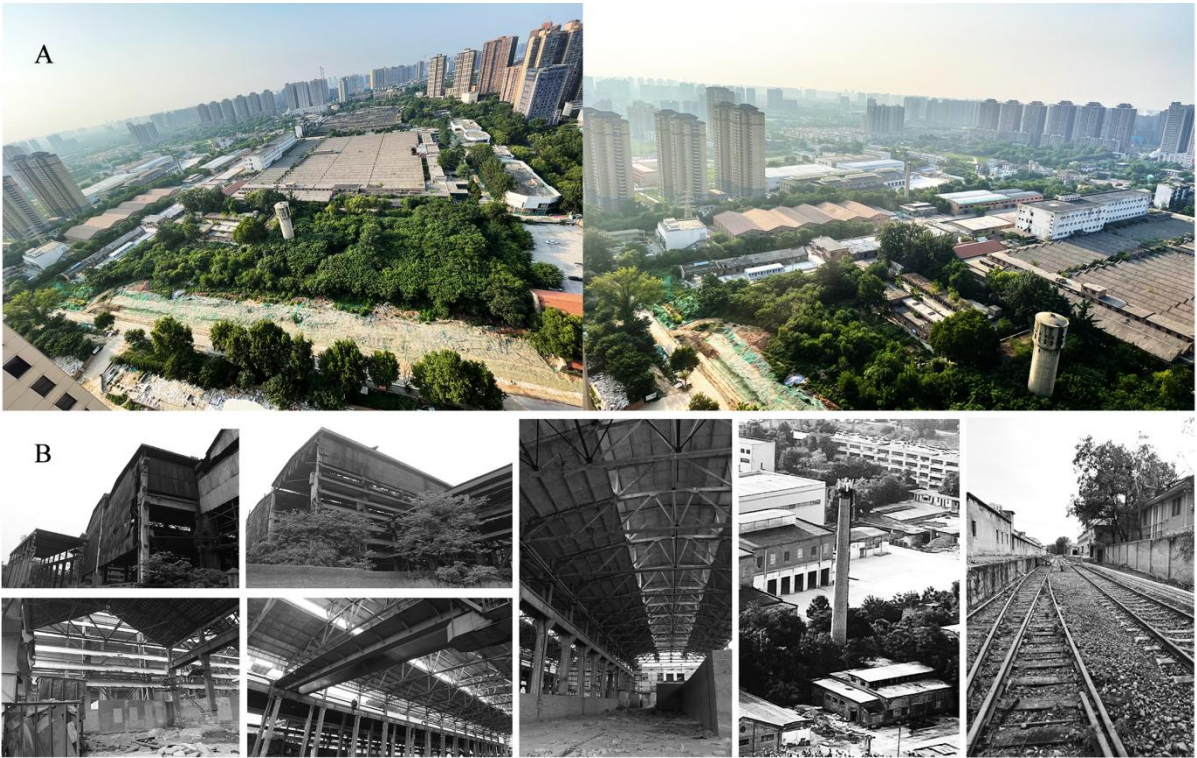

**Fig 7. Site spatial-physical status and industrial heritage construction.**

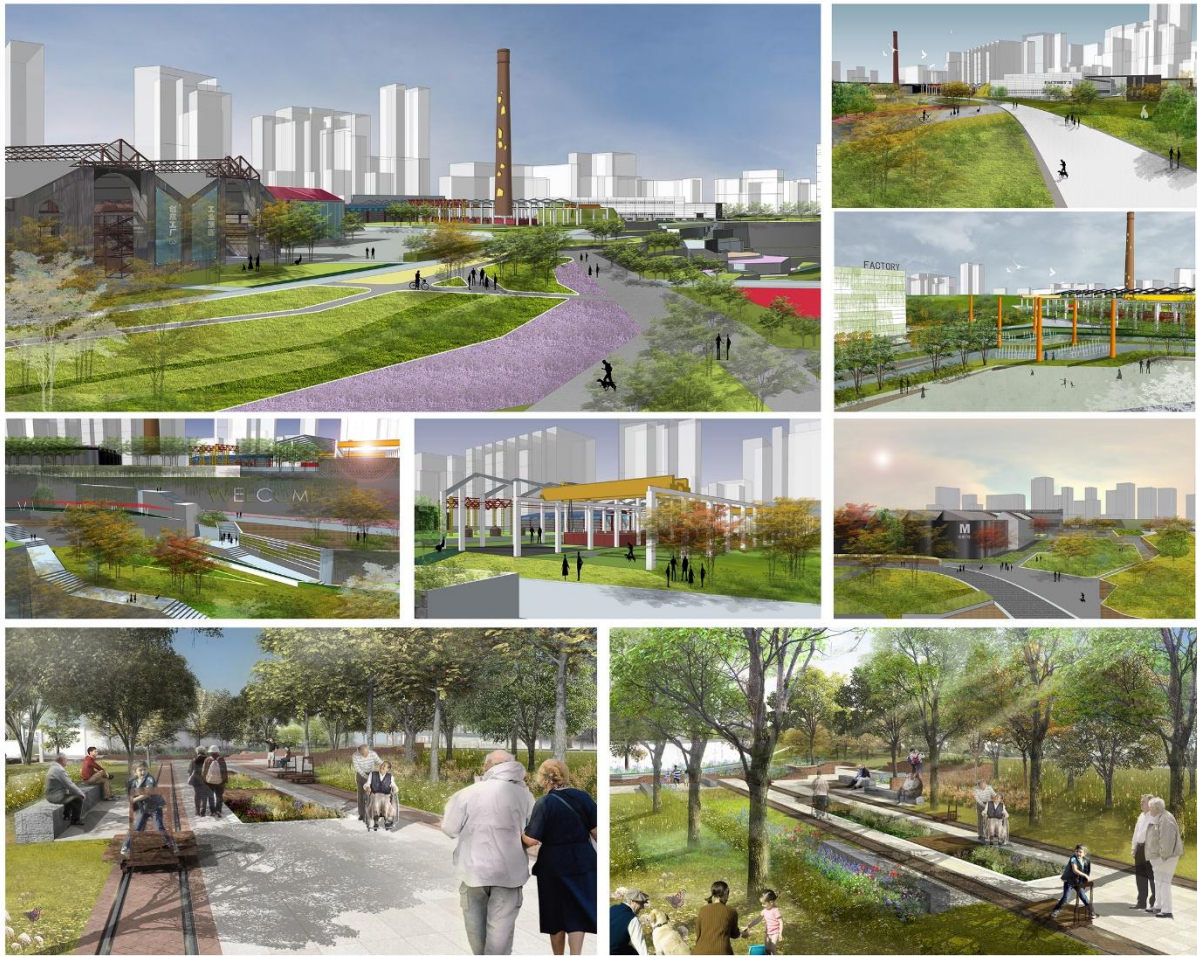

**Fig 8. Landscape regeneration of industrial buildings, structures, terrain, and plants.**
